# Supplementary material for: Synthesis and characterization of core–shell NMC microparticles as cathode materials for Li-ion batteries: insights from ex situ and in situ microscopy and spectroscopy techniques
Source: Royal Society of Chemistry journal article supplement (doi:10.1039/d4ma00994k), 2024-12-04
Supplement: d4ma00994k1.pdf [file d4ma00994k1.pdf]

Supplementary Information:

**Synthesis and characterization of core-shell NMC microparticles as cathode materials for Li-ion batteries: insights from *ex-situ* and *in-situ* microscopy and spectroscopy techniques**

J. García-Alonso,<sup>a</sup> S. Krüger,<sup>b</sup> K. Kelm,<sup>b</sup> E. Guney,<sup>c</sup> N. Yuca,<sup>c,d</sup> I. J. Villar-García,<sup>e,f</sup> B. Saruhan,<sup>b</sup> V. Pérez-Dieste,<sup>e</sup> D. Maestre,<sup>a,\*</sup> and B. Méndez<sup>a</sup>

<sup>a</sup> Departamento de Física de Materiales, Facultad de CC. Físicas, Universidad Complutense de Madrid, 28040, Madrid (Spain)

<sup>b</sup> Institute of Materials Research, German Aerospace Center (DLR, e.V.), Linder Hoehe 51147, Cologne, Germany

<sup>c</sup> Enwair Energy Technologies Corporation, Kagithane, Istanbul 34415, Turkey

<sup>d</sup> Energy Institute, Istanbul Technical University, İTÜ Ayazağa Kampüsü, Enerji Enstitüsü, 34469 Sarıyer, Istanbul, Türkiye

<sup>e</sup> ALBA Synchrotron Light Source, Carrer de la Llum 2-26, 08290 Cerdanyola del Vallès, Barcelona, Spain

<sup>f</sup> Departamento de Química, Facultad de Farmacia, Universidad CEU San Pablo, Urbanización Montepríncipe, 28668 Boadilla del Monte, Madrid, Spain

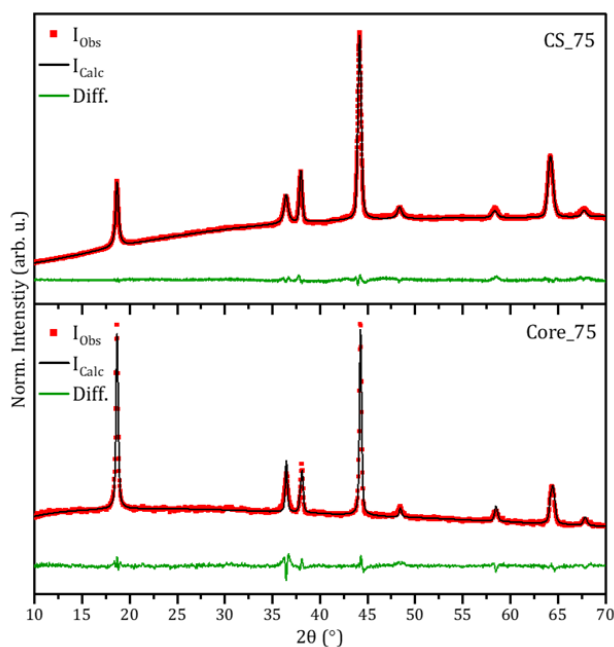

Fig. S1. Rietveld refinements of the XRD measurements for samples Core\_75 and CS\_75

Table S1. Parameters obtained from the Rietveld refinements shown in Figure S1.

| Sample                            | Core_75 | CS_75  |
|-----------------------------------|---------|--------|
| a (Å)                             | 2.886   | 2.892  |
| c (Å)                             | 14.221  | 14.262 |
| c / a                             | 4.928   | 4.932  |
| $Z_{\text{oxy}}$                  | 0.236   | 0.251  |
| $d_{\text{M-O Int.}} (\text{Å})$  | 1.938   | 2.060  |
| $d_{\text{M-O Vert.}} (\text{Å})$ | 3.751   | 3.547  |
| $R_{\text{wp}} (\%)$              | 2.75    | 1.53   |
| $R_{\text{p}} (\%)$               | 1.93    | 1.21   |
| $\chi^2$                          | 2.118   | 2.185  |
| Ni (3b)                           | 0.65    | 0.56   |
| Mn (3b)                           | 0.10    | 0.32   |
| Co (3b)                           | 0.10    | 0.09   |
| Li (3b)                           | 0.15    | 0.04   |
| Li (3a)                           | 0.68    | 0.73   |
| Ni (3a)                           | 0.15    | 0.04   |
| O (6c)                            | 0.88    | 0.92   |

Occupation of the 3b positions were only constrained to maintain a total sum of transition metal and Li equal to 1. Li (3a) was allowed to vary in the range of 0.5 - 1. Ni (3a) and Li (3b) were constrained to the same values.

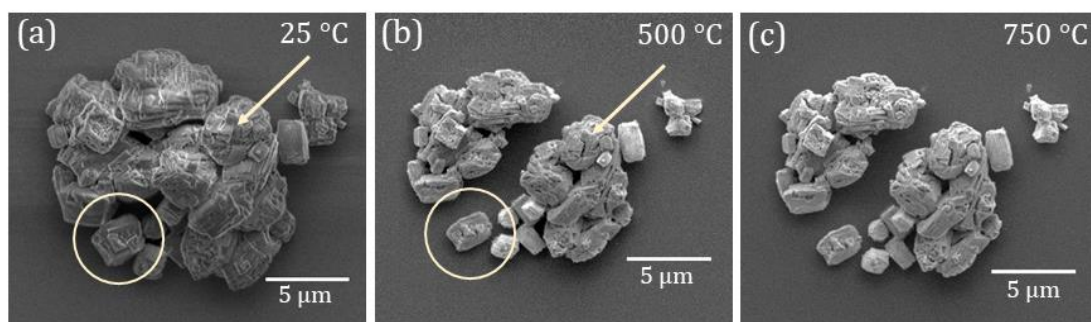

Fig. S2. In-situ SEM images of the untreated core-shell sample (a) without annealing and annealed at (b) 500 °C and (c) 750 °C.

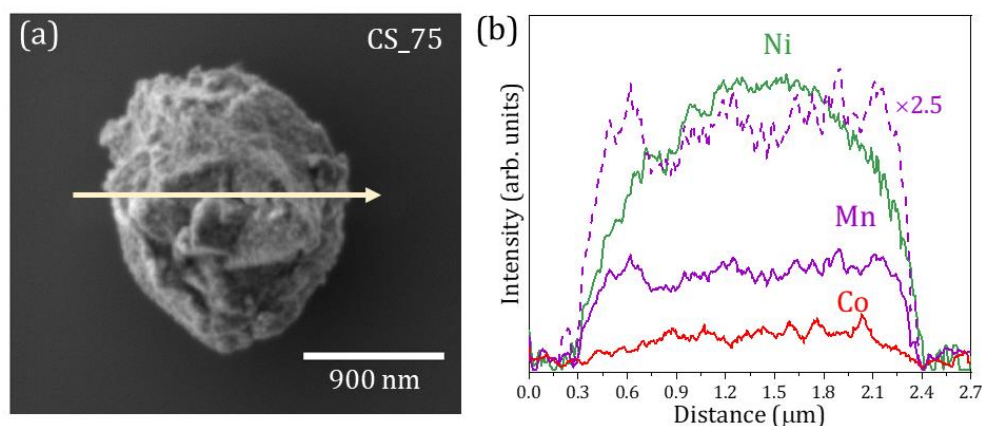

Fig. S3. (a) SEM image of a CS\_75 particle and (b) the corresponding EDS profiles acquired along the arrow marked in (a)

Table S2. Atomic (%) concentration and Ni/Mn/Co ratio from Core\_75 and CS\_75 estimated from ICP-OES analysis

| Sample  | Li (at. %) | Ni (at. %) | Mn (at. %) | Co (at. %) | Ni/Mn/Co    |
|---------|------------|------------|------------|------------|-------------|
| Core_75 | 39.0 ± 0.2 | 49.0 ± 1.5 | 6.0 ± 0.3  | 6.0 ± 0.2  | 8.0/1.0/1.0 |
| CS_75   | 37.1 ± 0.2 | 46.7 ± 1.5 | 10.4 ± 0.2 | 5.8 ± 0.2  | 7.4/1.7/0.9 |

Table S3. Parameters derived from the deconvolution of the Raman signal from samples Core\_75 and CS\_75.

| Band                 | Position (cm <sup>-1</sup> ) | FWHM (cm <sup>-1</sup> ) | Area (%) |
|----------------------|------------------------------|--------------------------|----------|
| Core_75              |                              |                          |          |
| Ni (E <sub>g</sub> ) | 359.4                        | 97.3                     | 8.8      |
| Co (E <sub>g</sub> ) | 433.7                        | 90.4                     | 18.0     |
| Co (A <sub>g</sub> ) | 482.0                        | 70.8                     | 24.1     |
| Ni (A <sub>g</sub> ) | 513.4                        | 55.9                     | 12.8     |
| Mn (E <sub>g</sub> ) | 544.2                        | 51.7                     | 14.8     |
| Mn (A <sub>g</sub> ) | 580.3                        | 54.2                     | 21.5     |
| CS_75                |                              |                          |          |
| Ni (E <sub>g</sub> ) | 356.2                        | 57.7                     | 2.5      |
| Co (E <sub>g</sub> ) | 433.3                        | 93.3                     | 17.1     |
| Co (A <sub>g</sub> ) | 487.6                        | 71.9                     | 15.6     |
| Ni (A <sub>g</sub> ) | 516.3                        | 33.7                     | 3.1      |
| Mn (E <sub>g</sub> ) | 545.3                        | 50.2                     | 18.6     |
| Mn (A <sub>g</sub> ) | 589.7                        | 63.5                     | 31.9     |
| LO (R-S)             | 567.9                        | 33.8                     | 11.1     |

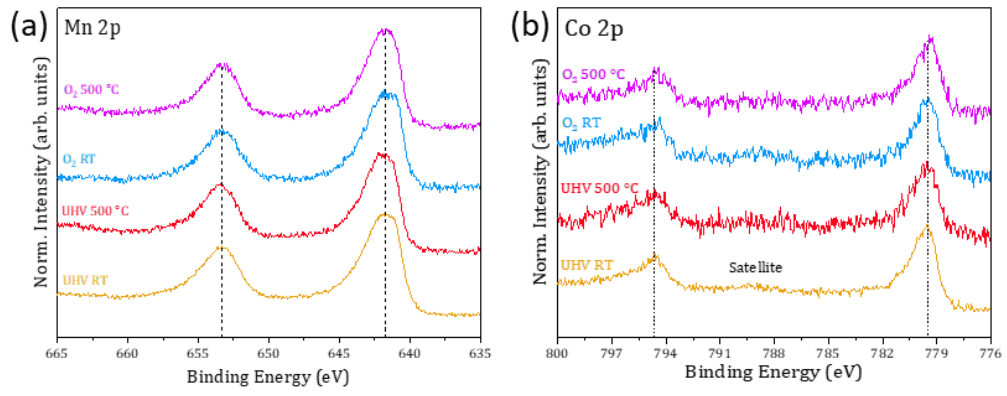

Fig. S4. In-situ XPS spectra from (a) Mn2p, (b) Co2p core levels acquired at 984 eV photon energy at room temperature and 500 °C, and under UHV and O<sub>2</sub> atmospheres.
